# Supplementary material
Source: publisher figshare collection journal article supplement (https://gsajournals.figshare.com/ndownloader/files/12389018)
Supplement: Supplementary file 1 [file 12389018]

## Sheet: Table S8
Table S8: Detailed position information for SVs identified in this report.
Type	FlyBase Chrom	Start position	End position	SV type	Bionano_Chrom	Start position	End position	ID	Length	Coverage in Bionano	Coverage in FlyBase	Gene affected	Additional feature
CNV	2L	5988156	5997242	CNV	Super-Scaffold_16	15468550	15459473	00059881562L	9087	2	1	ifc and lid
CNV	2L	5988156	5997242	CNV	Super-Scaffold_16	15459338	15450261	00059881562L	9087	2	1	ifc and lid
CNV	2L	16137177	16140842	CNV	Super-Scaffold_16	5312282	5308622	00161371772L	3666	2	1	none
CNV	2L	16137177	16140842	CNV	Super-Scaffold_16	5307804	5304146	00161371772L	3666	2	1	none
CNV	2L	19532428	19534586	CNV	Super-Scaffold_16	1904707	1902554	00195324282L	2159	2	1	CG10137 and CG33116
CNV	2L	19532428	19534586	CNV	Super-Scaffold_16	1902530	1900373	00195324282L	2159	2	1	CG10137 and CG33116
CNV	2L	6152563	6152769	CNV	Super-Scaffold_16	15294966	15294760	00061525632L	207	12	7	Muc26B
CNV	2L	6152563	6152769	CNV	Super-Scaffold_16	15293828	15293673	00061525632L	207	12	7	Muc26B
CNV	2L	6152563	6152769	CNV	Super-Scaffold_16	15293924	15293721	00061525632L	207	12	7	Muc26B
CNV	2L	6152563	6152769	CNV	Super-Scaffold_16	15294188	15294006	00061525632L	207	12	7	Muc26B
CNV	2L	6152563	6152769	CNV	Super-Scaffold_16	15294716	15294510	00061525632L	207	12	7	Muc26B
CNV	2L	6152563	6152769	CNV	Super-Scaffold_16	15294884	15294678	00061525632L	207	12	7	Muc26B
CNV	2L	6152563	6152769	CNV	Super-Scaffold_16	15294908	15294702	00061525632L	207	12	7	Muc26B
CNV	2L	6152563	6152769	CNV	Super-Scaffold_16	15294308	15294102	00061525632L	207	12	7	Muc26B
CNV	2L	6152563	6152769	CNV	Super-Scaffold_16	15294404	15294198	00061525632L	207	12	7	Muc26B
CNV	2L	6152563	6152769	CNV	Super-Scaffold_16	15294476	15294270	00061525632L	207	12	7	Muc26B
CNV	2L	6152563	6152769	CNV	Super-Scaffold_16	15295004	15294798	00061525632L	207	12	7	Muc26B
CNV	2L	6152563	6152769	CNV	Super-Scaffold_16	15294548	15294342	00061525632L	207	12	7	Muc26B
TE insertions	2L	313809	313809	INS	Super-Scaffold_16	21138321	21139733	2	1414	2.28571	23.1832	Plc21c	DNA/Hobo
TE insertions	2L	1139410	1139410	INS	Super-Scaffold_16	20303844	20312903	5	9061	2.22222	142.377	CG4577	LTR/Roo
TE insertions	2L	7101366	7101366	INS	Super-Scaffold_16	14351736	14354671	26	2937	2.28571	38.2142	Pvf3	LINE/I
TE insertions	2L	8361642	8361642	INS	Super-Scaffold_16	13092669	13101626	36	8959	2.16667	151.762	CG7627	LTR/Roo
TE insertions	2L	9681413	9685173	INS	Super-Scaffold_16	11769397	11774526	41	5131	0.000531915	44.8018	Pka-C1	LTR/Copia
TE insertions	2L	10139848	10139848	INS	Super-Scaffold_16	11309990	11311386	44	1398	80.375	23.6581	CG44153	DNA/Hobo
TE insertions	2L	12255996	12255996	INS	Super-Scaffold_16	9193009	9194418	45	1411	inf	23.1828	bru1	DNA/Hobo
TE insertions	2L	13906486	13906486	INS	Super-Scaffold_16	7541660	7543063	52	1405	2.28571	23.2868	Ance	DNA/Hobo
TE insertions	2L	14252360	14252360	INS	Super-Scaffold_16	7195027	7195884	54	859	2.16667	39.4808	none	LINE/Jockey
TE insertions	2L	14945667	14945667	INS	Super-Scaffold_16	6500811	6502213	60	1404	3.5	23.2393	CG42313	DNA/Hobo
TE insertions	2L	15680655	15680655	INS	Super-Scaffold_16	5742293	5743722	64	1431	3	22.8519	CG4587	DNA/Hobo
TE insertions	2L	15772793	15773391	INS	Super-Scaffold_16	5683804	5685201	66	1399	0.00334448	23.2852	CG31826	DNA/Hobo
TE insertions	2L	15827600	15827600	INS	Super-Scaffold_16	5622039	5630296	68	8259	19.5	149.967	Tabor{}384	LTR/Roo
TE insertions	2L	16141792	16141792	INS	Super-Scaffold_16	5303190	5307818	71	4630	10.0732	7.66955	Copia{}387	LTR/Copia
TE insertions	2R	7691156	7691156	INS	Super-Scaffold_6	1363594	1368731	135	5139	2.33333	44.4335	LRR	LTR/Copia
TE insertions	2R	11994030	11994030	INS	Super-Scaffold_6	5656214	5659046	158	2834	2.66667	29.4693	CR45319	LINE/Jockey
TE insertions	2R	13280042	13280042	INS	Super-Scaffold_6	6944192	6944615	164	425	2.25	300.687	DH31-R	LTR/Roo
TE insertions	2R	15969820	15969820	INS	Super-Scaffold_6	9618021	9618604	0000000183ci	583	inf	8.90566	Strn-Mlck	Unknown
TE insertions	2R	22571374	22571374	INS	Super-Scaffold_6	16202968	16208207	239	5241	2.2	48.084	dnr1	LTR/Copia
TE insertions	3R	12486724	12486854	INS	Super-Scaffold_96	19628133	19630186	1577	2055	42.2846	26.7343	None	LTR/Micropia
TE insertions	3R	16744288	16744288	INS	Super-Scaffold_96	15362791	15367922	423	5133	2.25	44.3177	bxd	LTR/Copia
TE insertions	3R	18456925	18459508	INS	Super-Scaffold_96	13641575	13651063	432	9490	1.00155	51.7602	fru	LTR/297 and LTR/Roo
TE insertions	3R	18792783	18792783	INS	Super-Scaffold_96	13300661	13307683	434	7024	2.28571	155.508	CG7720	LTR/Roo
TE insertions	3R	20987607	20987607	INS	Super-Scaffold_96	11105406	11106809	444	1405	2.25	23.2897	Calx,CG43446	DNA/Hobo
TE insertions	3R	21816543	21816543	INS	Super-Scaffold_96	10275274	10276677	448	1405	2.28571	23.279	CASK	DNA/Hobo
TE insertions	3R	24069661	24069661	INS	Super-Scaffold_96	8016004	8022882	459	6880	2.4	69.2426	eIF4EHP	LTR/297
TE insertions	3L	7495839	7495839	INS	Super-Scaffold_37	2390379	2397358	1009	6981	2.33333	154.423	Cyp4d8	LTR/Roo
TE insertions	3L	18911713	18911713	INS	Super-Scaffold_37	13810247	13815375	1267	5130	2.5	48.6298	CG14077	LTR/Copia
TE insertions	X	691456	691456	INS	Super-Scaffold_1	20715197	20718424	498	3229	2.22222	71.1155	sdk	DNA/FB4
TE insertions	X	2333455	2333455	INS	Super-Scaffold_1	19087314	19091481	513	4169	2.4	75.5742	Raf,Ilp6	LTR/297
TE insertions	X	4779546	4779546	INS	Super-Scaffold_1	16653594	16654996	547	1404	2.28571	23.2764	none	DNA/Hobo
TE insertions	X	5821703	5821703	INS	Super-Scaffold_1	15608148	15614282	555	6136	3.5	19.6794	CG15765	LTR/DIVER
TE insertions	X	13919650	13919650	INS	Super-Scaffold_1	7557473	7559081	639	1610	2.4	27.1963	mamo	LINE/R1
TE insertions	X	17376843	17376843	INS	Super-Scaffold_1	4117983	4119202	672	1221	2.18182	42.0524	none	LINE/I
Deletions	2L	2100432	2109522	DEL	Super-Scaffold_16	19346921	19346927	9	9091	145.747	2.50038	dpr3	Roo{}2620
Deletions	2L	7977136	7984050	DEL	Super-Scaffold_16	13479130	13479135	34	6915	80.2147	2.77907	Snoo	297{}323
Deletions	2R	7608466	7613614	DEL	Super-Scaffold_6	1286081	1286067	134	5149	42.6369	2.14286	CG1358	I{}769
Deletions	2R	7869246	7873977	DEL	Super-Scaffold_6	1546705	1546694	137	4732	106.457	2.18182	Dgk	Doc{}772
Deletions	2R	8398268	8402994	DEL	Super-Scaffold_6	2069883	2069873	141	4727	106.545	2.2	CG2121	Doc{}776
Deletions	2R	14394291	14399025	DEL	Super-Scaffold_6	8050073	8050061	172	4735	106.423	2.16667	none	Doc{}827
Deletions	2R	17798462	17798882	DEL	Super-Scaffold_6	11443700	11443691	200	421	132.581	3.33333	Dhit	297{}845
Deletions	3R	12480230	12485255	DEL	Super-Scaffold_96	19636079	19637419	398	5026	40.147	2.78296	none	several
Deletions	X	10525127	10532120	DEL	Super-Scaffold_1	10914859	10914866	595	6994	80.232	4.3954	spri	297{}98
Deletions	X	11633472	11640467	DEL	Super-Scaffold_1	9816194	9816198	603	6996	79.5109	1.44854	Ptp10D	297{}109
Deletions	X	17114222	17118359	DEL	Super-Scaffold_1	4375493	4376509	669	4138	23.1672	1.7316	CG5004	Tirant
Deletions	X	18754807	18757584	DEL	Super-Scaffold_1	2742432	2742847	683	2778	69.0363	2.10415	None	297{}1721
